# Supplementary material for: Synthesis of three-dimensionally ordered macroporous composite Ag/Bi2O3–TiO2by dual templates and its photocatalytic activities for degradation of organic pollutants under multiple modes
Source: Royal Society of Chemistry journal article supplement (doi:10.1039/c4nj01002g), 2014-08-05
Supplement: c4nj01002g1.pdf [file c4nj01002g1.pdf]

# Electronic Supplementary Information

## Synthesis of Three-Dimensionally Ordered Macroporous Composite Ag/Bi<sub>2</sub>O<sub>3</sub>-TiO<sub>2</sub> by Dual Templates and its Photocatalytic Activities for Degradation of Organic Pollutants under Multiple Modes

Li Li<sup>a,c\*</sup>, Xiandan Huang<sup>a</sup>, Tianyu Hu<sup>b</sup>, Jianxin Wang<sup>a</sup>, Wenzhi Zhang<sup>a</sup>, Jianqi Zhang<sup>a</sup>

a. College of Materials Science and Engineering, Qiqihar University, Qiqihar 161006, PR China

b. College of Environment and Resources, Jilin University, Changchun130024, PR China

c. Key Laboratory of Composite Modified Material of Colleges in Heilongjiang Province,

Qiqihar 161006, PR China

### SUMMARY

The emission spectrum of microwave discharge electrodeless lamp and the microwave assisted photocatalytic reaction device were shown in Fig. S1, S2.

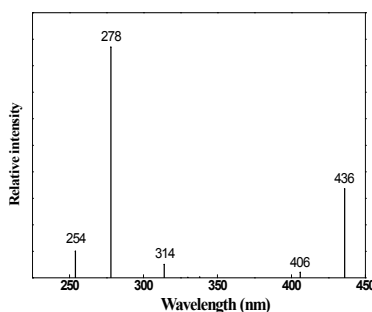

Fig. S1 Emission spectrum of microwave discharge electrodeless lamp

---

\* Corresponding author.

E-mail address: qqhrlili@126.com (L. Li); qqhrll@163.com

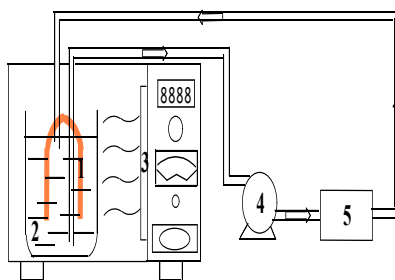

Fig. S2 The picture of microwave-assisted photocatalytic apparatus (1- microwave discharge electrodeless lamp, 2 - reaction solution, 3 - microwave transmitter, 4 - peristaltic pump, and 5-cooler)

The adsorption test results of CV using different catalysts were performed as follows: a certain amount of photocatalyst was dispersed into CV solution by ultrasound 10 min, and then the suspension was magnetically stirred in dark. At definite time interval, taking 3 mL solution into a centrifuge tube and the catalyst was removed by centrifugation after the completion of the reaction. The concentration of CV in the adsorption reaction was analyzed by a UV–Vis spectrophotometer (TU-1901, China) at 590 nm.

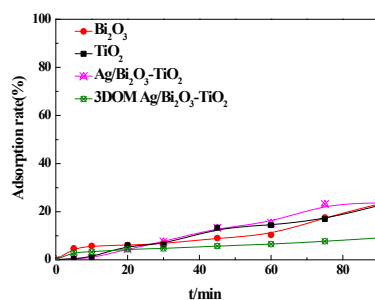

Fig. S3 The adsorption test results of CV using different catalysts
